# Supplementary material for: Three dimensional architecture of carbon wrapped multilayer Na3V2O2(PO4)2F nanocubes embedded in graphene for improved sodium ion batteries
Source: Royal Society of Chemistry journal article supplement (doi:10.1039/c5ta03164h), 2015-01-01
Supplement: c5ta03164h1.pdf [file c5ta03164h1.pdf]

## Supporting Information

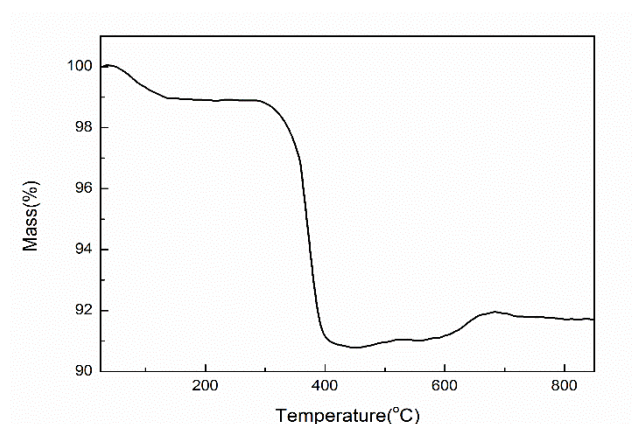

**Figure S1.** TG curves of NVPF@C/G sample  
(The TG (STA409PC) result was under a heating rate of 10°C/min and the air atmosphere flowing rate of 25 mL/min.)

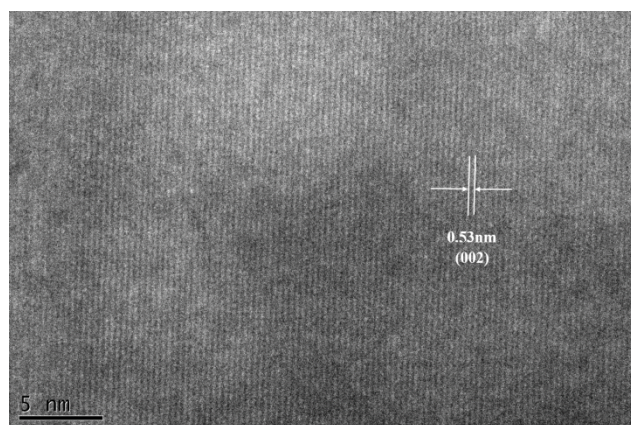

**Figure S2.** HRTEM image of NVPF@C/G

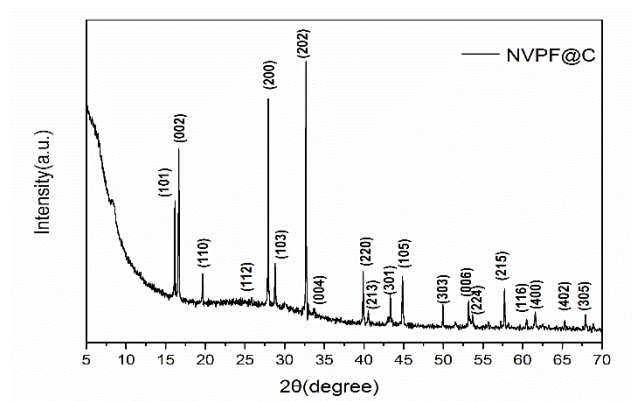

**Figure S3.** XRD patterns of NVPF@C.
